# Supplementary material for: Exploring the effectiveness of novel benzimidazoles as CB2 ligands: synthesis, biological evaluation, molecular docking studies and ADMET prediction
Source: Royal Society of Chemistry journal article supplement (doi:10.1039/c8md00461g), 2018-01-01

## Supporting information

### Exploring the effectiveness of novel benzimidazoles as CB2 ligands: synthesis, biological evaluation, molecular docking studies and ADMET prediction

Michele Tonelli,<sup>\*,a</sup> Elena Cichero,<sup>a</sup> Ali Mokhtar,<sup>b</sup> Alessandro Rabbito,<sup>b</sup> Bruno Tasso,<sup>a</sup> Paola Fossa<sup>a</sup> and Alessia Ligresti<sup>b</sup>

<sup>a</sup>Dipartimento di Farmacia, Università degli Studi di Genova, Viale Benedetto XV, 3, 16132 Genova -Italy.

<sup>b</sup>National Research Council of Italy, Institute of Biomolecular Chemistry, Endocannabinoid Research Group, Via Campi Flegrei 34, 80078 Pozzuoli (Na) - Italy.

**Table 1S.** Binding affinity values estimated by molecular docking studies of the reference compounds **2b**, **3b** and **5b** (Figure 3) as well as of the compounds **1-4**, **8**, **11** and **12** within the hCB2 receptor.

| Receptor-Ligand Complex (LeadIT) | Binding Affinity Energy $\Delta G$ (kJ/mol) |
|----------------------------------|---------------------------------------------|
| hCB2-1                           | -15.0                                       |
| hCB2-2                           | -18.0                                       |
| hCB2-3                           | -25.0                                       |
| hCB2-4                           | -21.0                                       |
| hCB2-8                           | -23.0                                       |
| hCB2-11                          | -28.0                                       |
| hCB2-12                          | -8.0                                        |
| hCB2-2b                          | -37.0                                       |
| hCB2-3b                          | -46.9                                       |
| hCB2-5b                          | -43.8                                       |

$^1\text{H}$  NMR spectra of compound **14**.

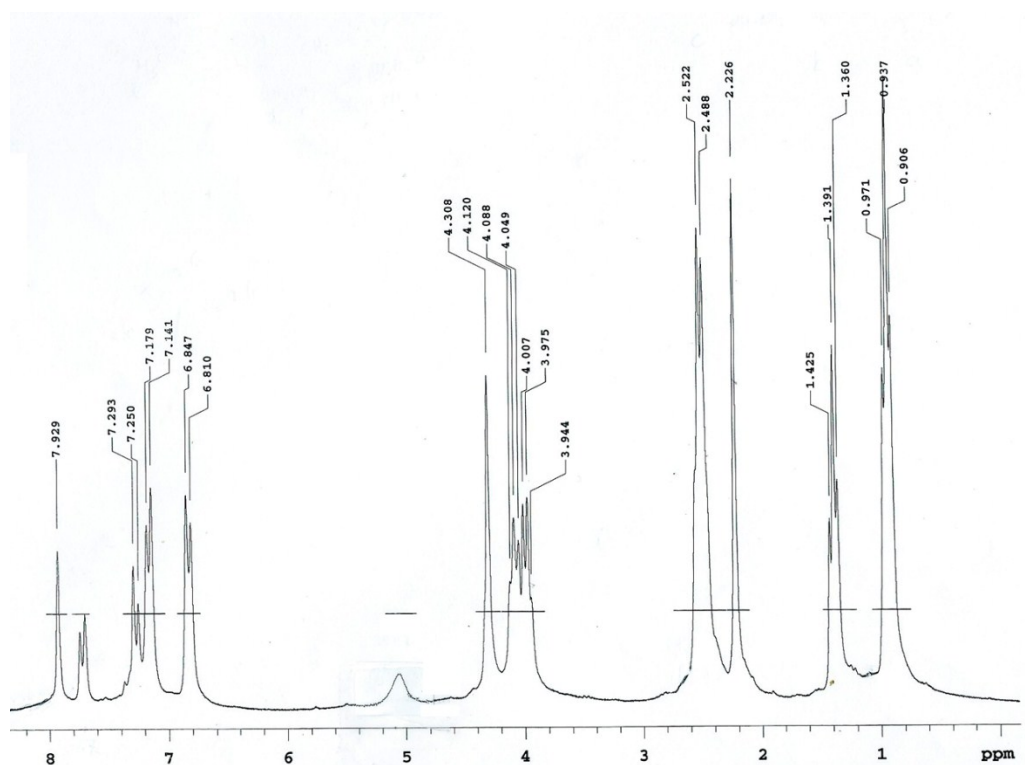

$^{13}\text{C}$  NMR spectra of compound **14**.

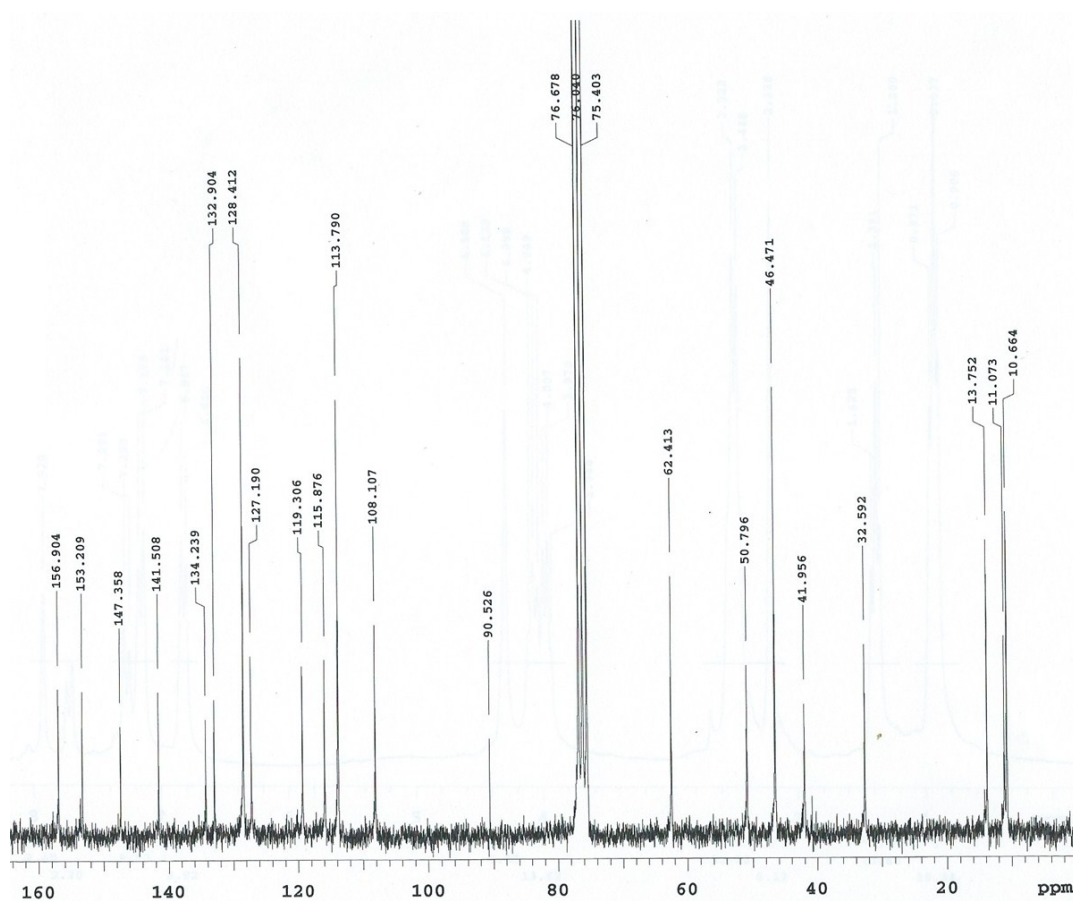

Supplement: c8md00461g1.pdf [file c8md00461g1.pdf]
